# Supplementary material for: c.A2456C-substitution in Pck1 changes the enzyme kinetic and functional properties modifying fat distribution in pigs
Source: PubMed Central journal article supplement (PMC4726144; doi:10.1038/srep19617), 2016-01-21
Supplement: srep19617-s1.pdf [file srep19617-s1.pdf]

## SUPPLEMENTARY INFORMATION

### **c.A2456C-substitution in *Pck1* changes the enzyme kinetic and functional properties modifying fat distribution in pigs**

Pedro Latorre<sup>1,2</sup>, Carmen Burgos<sup>1,2</sup>, Jorge Hidalgo<sup>1</sup>, Luis Varona<sup>2,3</sup>, José Alberto Carrodegua<sup>\*2,4,5</sup> & Pascual López-Buesa<sup>\*1,2</sup>

<sup>1</sup>Departamento de Producción Animal y Ciencia de los Alimentos, Facultad de Veterinaria, Universidad de Zaragoza, 50013 Zaragoza, Spain, <sup>2</sup>Instituto de Biocomputación y Física de Sistemas Complejos, Universidad de Zaragoza, 50018 Zaragoza, Spain, and <sup>3</sup>Departamento de Anatomía, Embriología y Genética, Facultad de Veterinaria, Universidad de Zaragoza, 50013 Zaragoza, Spain. <sup>4</sup> Departamento de Bioquímica y Biología Molecular y Celular, Facultad de Ciencias, Universidad de Zaragoza, 50009 Zaragoza, Spain. <sup>5</sup> IIS Aragón, 50009 Zaragoza, Spain. Correspondence should be addressed to P.L.B. or J.A.C. (e-mail: plopezbu@unizar.es, phone +34 976762533; carrode@unizar.es, phone +34 876555416).

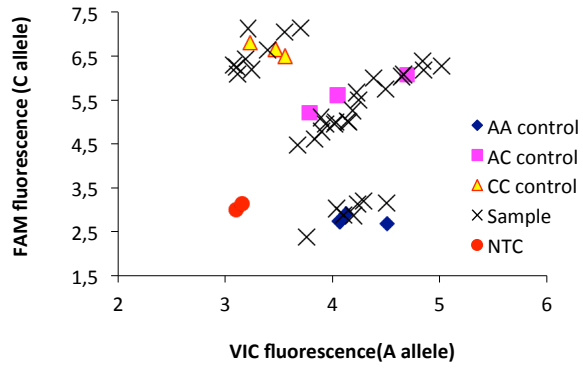

**Supplementary Figure 1 | Scatter plot of RT-PCR allelic discrimination assay to genotype *Pck1* c. A2456C polymorphism.**

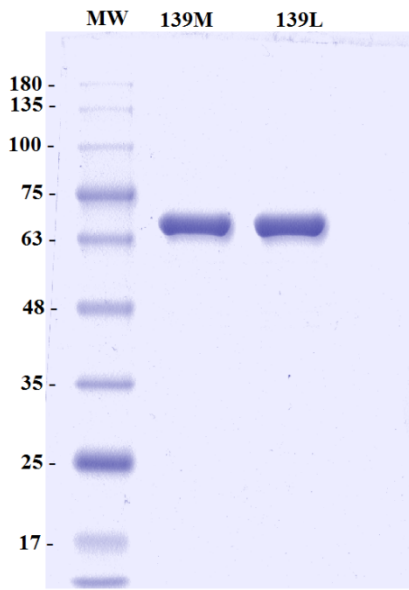

**Supplementary Figure 2 | SDS-PAGE of purified Pck1 p.139Met (139M) and Pck1 p.139Leu (139L).**

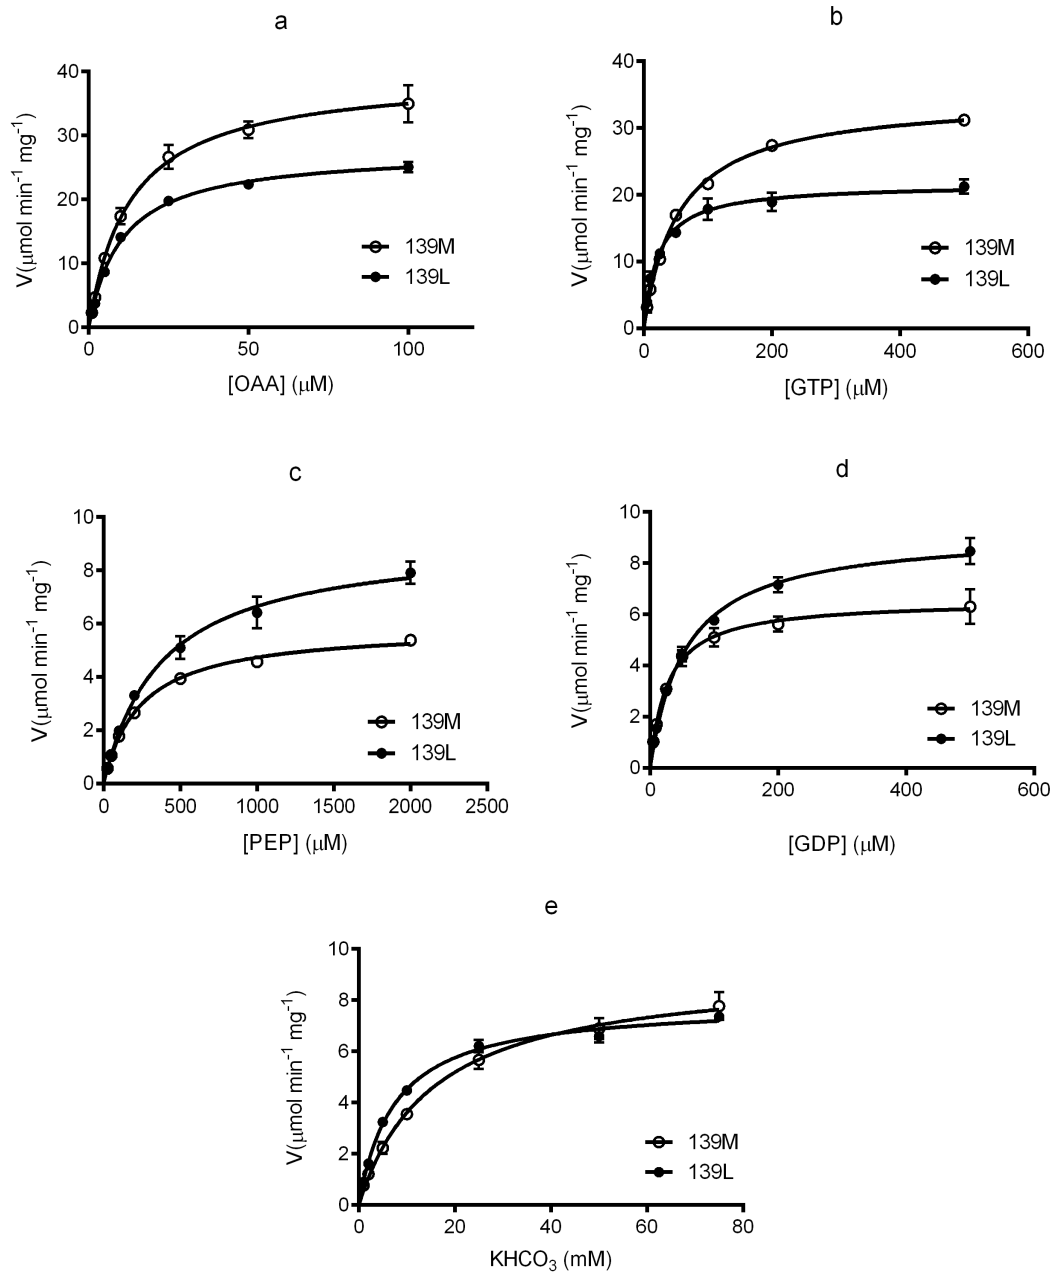

**Supplementary figure 3 | Dependence of rate on substrate concentration.** Kinetic constants were calculated from these data using EnzFitter, a non-linear regression software for enzyme kinetics. The main substrates of the Pck1 reaction **(a)** oxaloacetic acid (OAA), **(b)** GTP, **(c)** phosphoenolpyruvate (PEP), **(d)** GDP and **(e)**  $\text{KHCO}_3$  were studied.

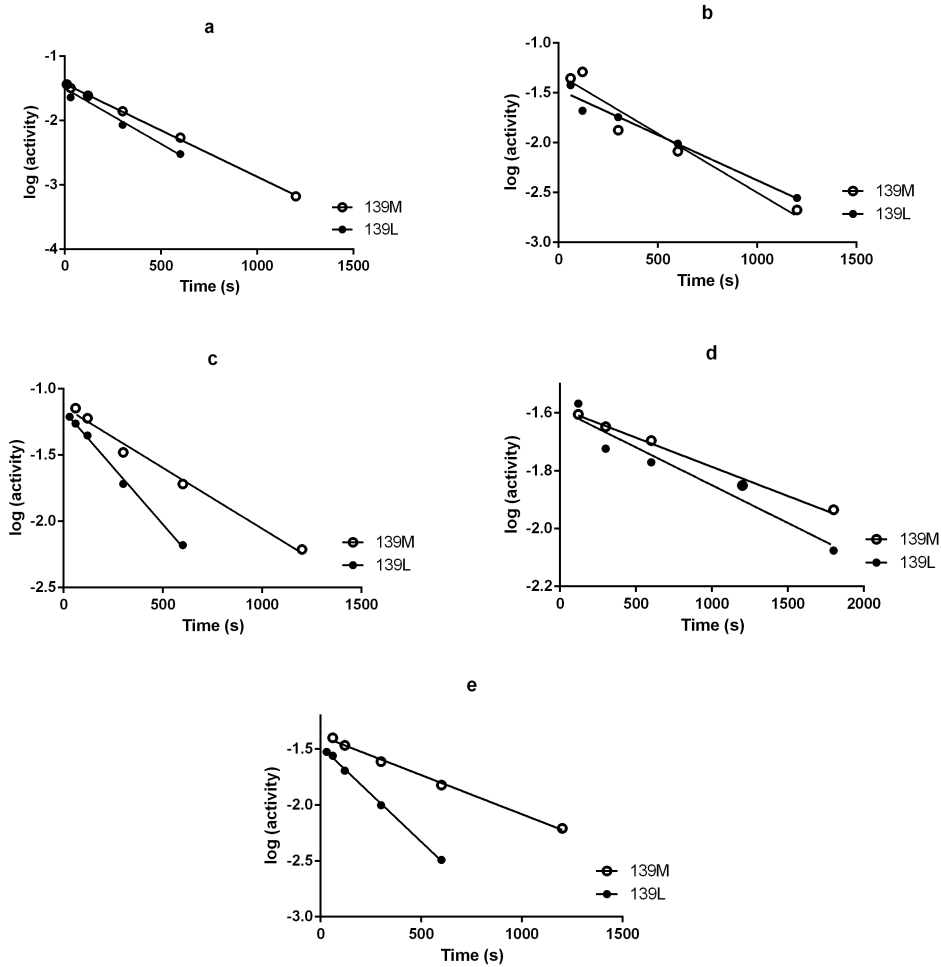

**Supplementary figure 4 | Semilog plots for  $D_t$  calculations.** Enzyme aliquots were heated at 50°C constant temperature for different times. Then, they were immediately cooled and assayed for residual activity. The figure shows representative experiments performed in **(a)** the absence of substrates or in the presence of **(b)** OAA, **(c)** GTP, **(d)** PEP or **(e)** GDP.

**a**

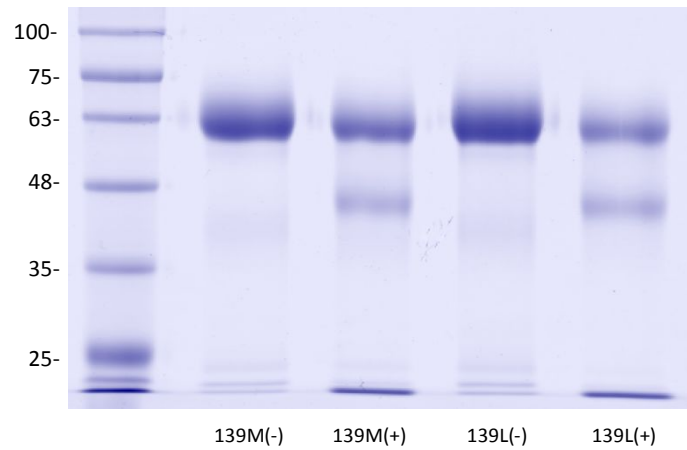

**b**

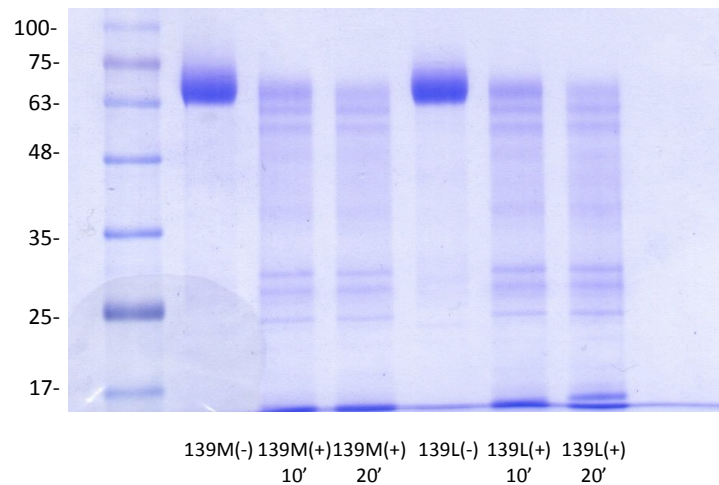

**Supplementary figure 5 | Trypsin and proteinase K sensitivity of Pck1 p.139Met and Pck1 p.139Leu. (a)** Trypsin sensitivity was assayed preparing 10  $\mu\text{g}/\text{mL}$  trypsin and mixing 2  $\mu\text{L}$  of this solution with 10  $\mu\text{L}$  of Pck1 (0.5  $\text{mg}/\text{mL}$ ). Incubation took place at 37°C for 18h. For the **(b)** proteinase K sensitivity assay, protease was prepared at 2  $\mu\text{g}/\text{mL}$ . Pck1 and proteinase K were mixed as described for trypsin sensitivity but incubated at 37°C for 10 or 20 minutes. The reaction was stopped by adding 2x SDS-loading buffer and boiling for 5 minutes. No differences were observed between Pck1 p.139Met and Pck1 p.139Leu hydrolysis band pattern using these proteases.
